# Supplementary material
Source: MDPI journal article supplement (https://www.mdpi.com/2221-3759/10/1/12)
Supplement: s1 [file s1]

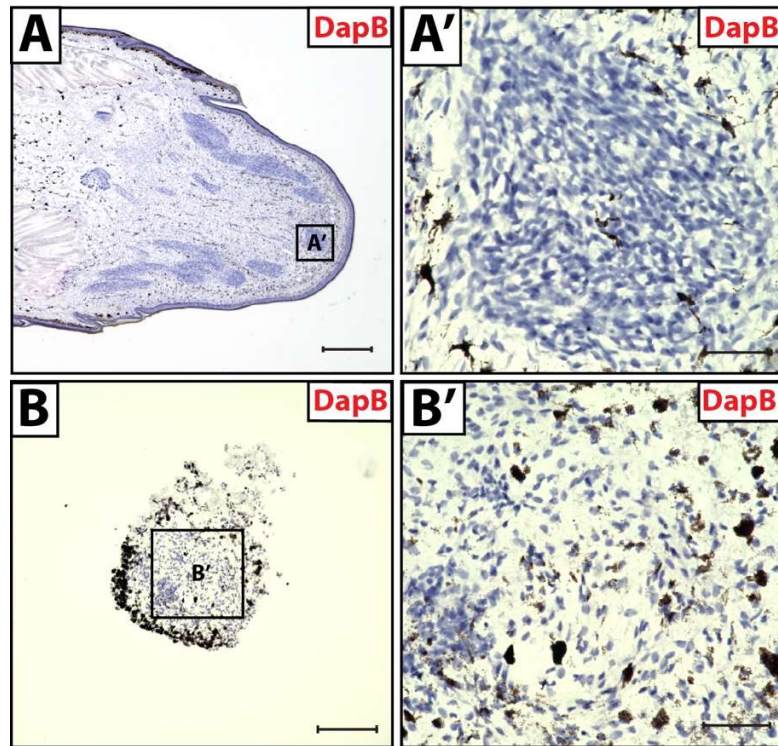

**Figure S1.** RNAscope negative control in lizard blastema and cell pellets. **(A)** Control lizard tail blastema (D14) analyzed by in situ hybridization for bacterial DapB expression. **(A')** Higher magnification view of blastema cell region identified in Panel A demonstrating lack of DapB expression in blastema cells. **(B)** Control cell pellet isolated via Trypsin protocol cultured in mammalian media analyzed by in situ hybridization for bacterial DapB expression. **(B')** Higher magnification views of cell pellet identified in Panel B demonstrating lack of DapB expression in cultured cells. **(A)** Scale bar = 500  $\mu$ M. **(B)** Scale bar = 200  $\mu$ M. **(A',B')** Scale bar = 50  $\mu$ M.
